# Supplementary material for: Intestinal non-canonical NFκB signaling shapes the local and systemic immune response
Source: PubMed Central journal article supplement (PMC6368617; doi:10.1038/s41467-019-08581-8), 2019-02-08
Supplement: 41467_2019_8581_MOESM1_ESM.pdf [file 41467_2019_8581_MOESM1_ESM.pdf]

## **Supplementary Information**

**Intestinal non-canonical NF $\kappa$ B signaling shapes the local and systemic immune response.**

**Ramakrishnan et al.**

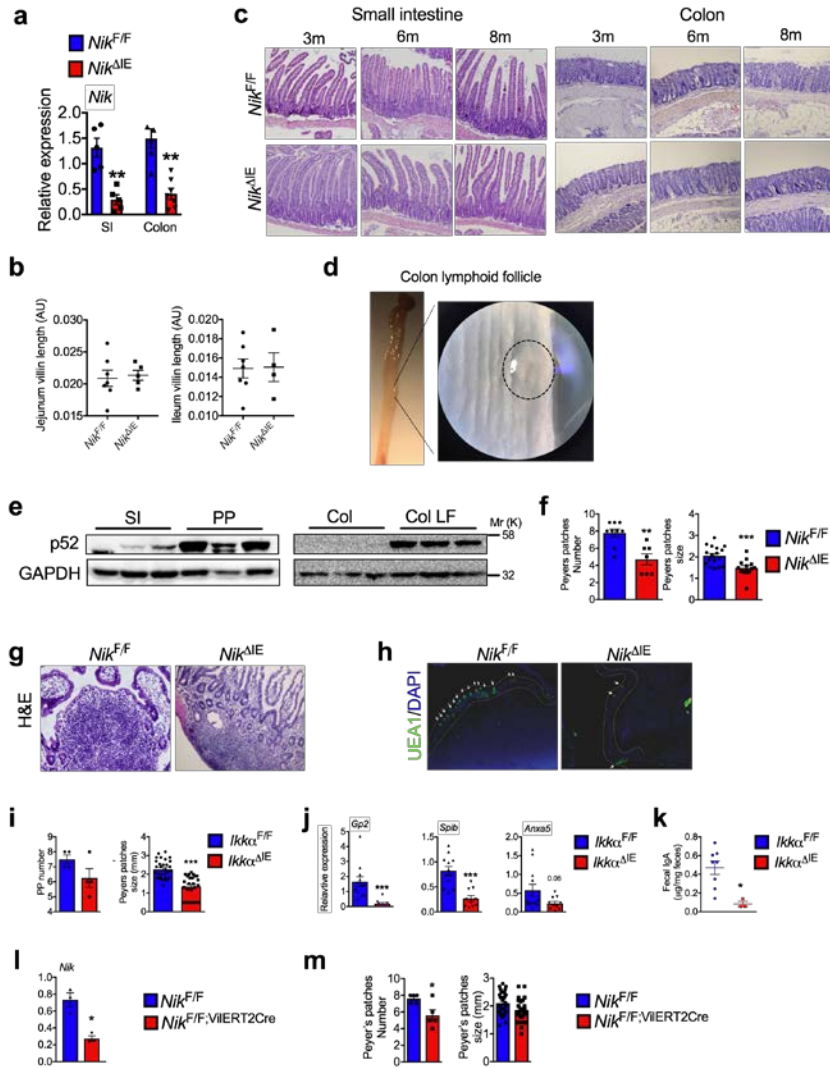

### Supplementary Fig. 1

Epithelial NIK- $IKK\alpha$  signaling is essential for M-cell maintenance. **a** Expression of NIK assessed by qPCR in the small intestine (SI) and colon of 6-week old  $Nik^{F/F}$  and  $Nik^{\Delta IE}$  mice. **b** Intestinal villi length (Jejunum, left; ileum, right) assessed in 6-week old  $Nik^{F/F}$  and  $Nik^{\Delta IE}$  mice. **c** H&E analysis of small intestine and colon of  $Nik^{F/F}$  and  $Nik^{\Delta IE}$  assessed at the age of 3, 6 or 8 months. Images were taken at 10X magnification.  $n=3$  mice/group. **d** Gross image showing colon lymphoid follicles. Colon follicles were dissected using dissection scope and used for further analysis. **e** Western blot analysis of p52 in the small intestine (SI), Peyer's patches (PP), colon (col) and colon lymphoid follicles (Col LF) of WT mice. **f** Peyer's patch number and size assessed in 6-week old  $Nik^{\Delta IE}$  mice. **g** H&E analysis of Peyer's patch from  $Nik^{F/F}$  and  $Nik^{\Delta IE}$  mice. Images were taken at 20X magnification. **h** Staining for M-cell marker UEA-1 in the Peyer's patches of  $Nik^{\Delta IE}$  mice. Images were taken at 20X magnification. **i** Peyer's patch number and size assessed in 7-week old  $Ikka^{\Delta IE}$  mice. **j** qPCR analysis for M-cell markers in the Peyer's patches of  $Ikka^{\Delta IE}$  mice. **k** Fecal IgA measured in  $Ikka^{\Delta IE}$  mice. **l** mRNA levels of *Nik* in  $Nik^{F/F;VilERT2Cre}$  mice at 2-weeks after tamoxifen treatment. **m** Peyer's patch number and size assessed in  $Nik^{F/F;VilERT2Cre}$  mice at 2-weeks after tamoxifen treatment. Results are expressed as mean  $\pm$  SEM. Significance was determined using *t* test. \* $P < 0.05$ ; \*\* $P < 0.01$ ; \*\*\* $P < 0.001$ .

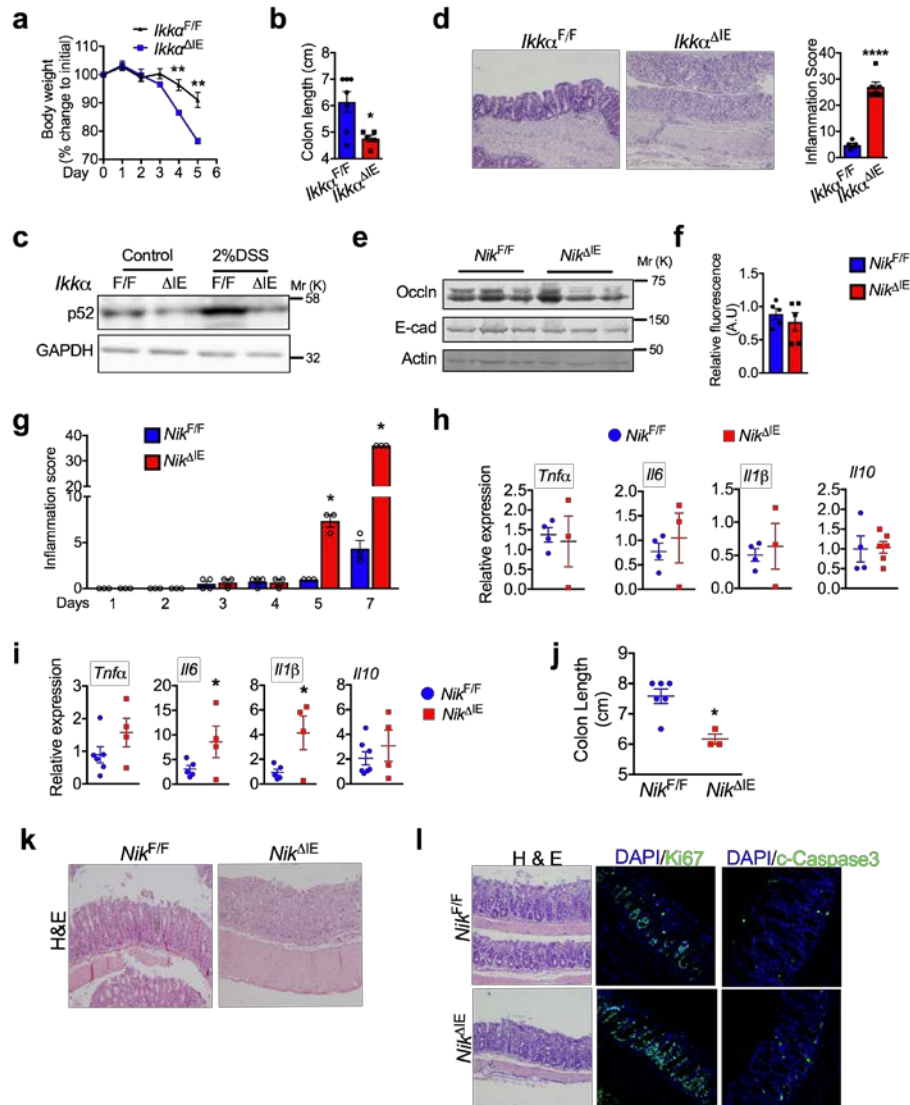

### Supplementary Fig. 2

Loss of epithelial NIK- $\text{IKK}\alpha$  signaling increases colitis independent of pro-inflammatory changes. **a-d** Body weight (**a**), colon length (**b**), p52 expression (**c**) and H&E analysis of colon (**d**) in *Ikkα<sup>F/F</sup>* and *Ikkα<sup>ΔIE</sup>* mice were treated with 2% DSS for 5-days. Images were taken at 10X magnification.  $n=4-7$  mice/group. **e** Western blot analysis for occludin, e-cadherin in the colon of 6-week old *Nik<sup>ΔIE</sup>* mice ( $n=3$ /group). **f** Intestinal permeability was assessed by FITC-dextran assay in 6-week old mice treated with 2% DSS for 7-days. **g** Inflammation score in *Nik<sup>ΔIE</sup>* treated with 2% DSS for 0-7days **h, i** qPCR analysis of *Tnf-α*, *IL-6*, *IL-1β* and *IL10* in the colon epithelial cells of *Nik<sup>ΔIE</sup>* treated with 2% DSS for 3-days (**h**) or 7-days (**i**). **j, k** Colon length (**j**) and colon inflammation (**k**) assessed by H&E at day-7 in *Nik<sup>F/F</sup>* and *Nik<sup>ΔIE</sup>* mice following *Salmonella*-induced colitis. Images were taken at 10X magnification. **l** *Nik<sup>F/F</sup>* and *Nik<sup>ΔIE</sup>* mice were lethally irradiated with 12Gy x-rays and 3-days post irradiation, the colon was assessed by H&E (for morphological and inflammatory changes), Ki67 (for cell proliferation) and cleaved Caspase3 (for apoptosis). Images were taken at 10X magnification. Results are expressed as mean  $\pm$  SEM. Significance was determined using *t* test. \* $P < 0.05$ ; \*\* $P < 0.01$ ; \*\*\* $P < 0.001$ , \*\*\*\* $P < 0.0001$ .

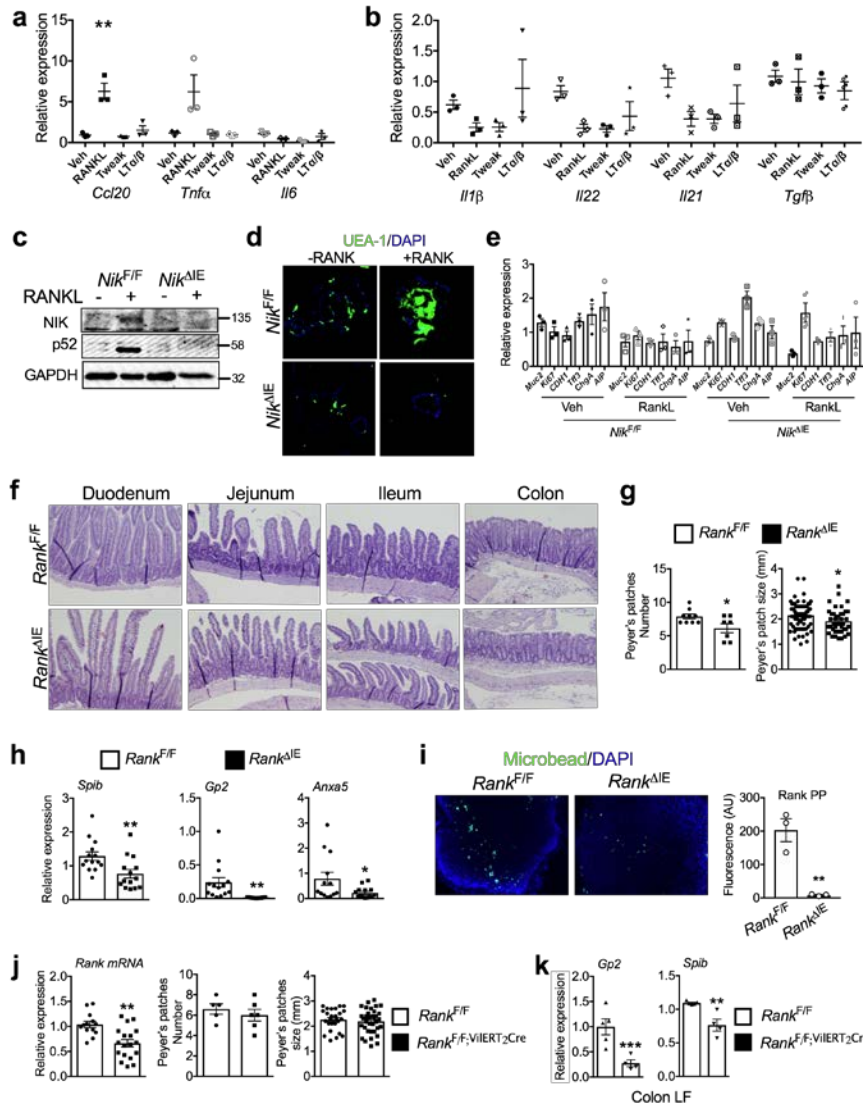

### Supplementary Fig. 3

RANK is required for NIK-mediated M-cell maintenance. **a**, **b** qPCR analysis for cytokine expression in enteroids treated with Vehicle, 100ng/ml RANKL, 100ng/ml Tweak, 10ng/ml LT $\alpha/\beta$  for 72 hours. **c** Western blot analysis of NIK and p52 in lysates from duodenal enteroids that were treated with 100ng/ml RANKL for 72-hours. Experiment was done in triplicate. **d** UEA-1 lectin staining of duodenal enteroids that were treated with 100ng/ml RANKL for 72-hours. **e** qPCR analysis for epithelial and secretory markers in *Nik* <sup>$\Delta$ IE</sup> enteroids treated with 100ng/ml RANKL for 72-hours. **f** H&E analysis of small intestine and colon of 6-week old *Rank* <sup>$\Delta$ IE</sup> mice. Images were taken at 10X magnification. **g** Peyer's patch size and number assessed in *Rank* <sup>$\Delta$ IE</sup> mice. **h** qPCR analysis of M-cell markers in the Peyer's patches of *Rank* <sup>$\Delta$ IE</sup> mice. **i** Antigen sampling assessed using microbeads in the Peyer's patch of *Rank* <sup>$\Delta$ IE</sup> mice. Images were taken at 20X magnification. **j** qPCR analysis for RANK in Peyer's patch, size and number of Peyer's patches in *Rank*<sup>F/F;VilERT2Cre</sup> mice at 2-weeks after tamoxifen treatment. **k** qPCR analysis of M-cell markers in the colon of *Rank*<sup>F/F;VilERT2Cre</sup> mice at 2-weeks after tamoxifen treatment. Results are expressed as mean  $\pm$  SEM. Significance was determined using *t* test. \**P* < 0.05; \*\**P* < 0.01, \*\*\**P* < 0.001.

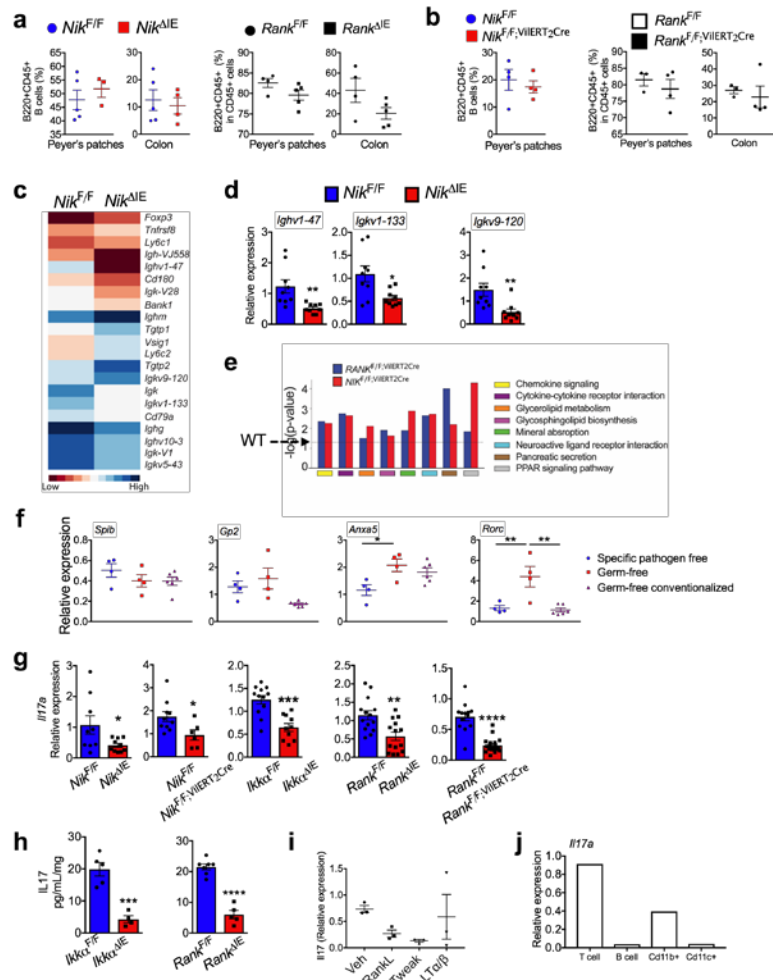

### Supplementary Fig. 4

Loss of epithelial NIK decreases IL17 expression in PP T-cells. **a, b** Flow analysis for B-cells in Peyer's patches and colon of *Nik*<sup>ΔIE</sup> and *Rank*<sup>ΔIE</sup> mice (**a**) and *Nik*<sup>F/F;VilERT2Cre</sup> and *Rank*<sup>F/F;VilERT2Cre</sup> mice at 2-weeks after tamoxifen treatment (**b**). **c** Heat map of microarray analysis in the colon of 6-week old *Nik*<sup>F/F</sup> and *Nik*<sup>ΔIE</sup> mice. n=3-4/group. **d** qPCR analysis of key genes involved in B-cell class switching assessed in the Peyer's patches of *Nik*<sup>ΔIE</sup> mice; n=9 mice/group. **e** Pathway analysis of differentially expressed transcripts identified by RNA-seq in the Peyer's patches of *Nik*<sup>F/F;VilERT2Cre</sup> and *Rank*<sup>F/F;VilERT2Cre</sup> mice. The analysis was compared to WT controls which is normalized to 1. **f** qPCR analysis for the marker of M-cells and *Rorc* in the Peyer's patches of specific pathogen free (SPF), germ free (GF) and GF mice conventionalized for 2-weeks by fecal transplant from SPF donors. **g** qPCR analysis for *Il17a* expression in the peyers patches of mice with intestinal epithelial specific disruption of NIK, IKKα or RANK. n=6-14 mice/group. **h** IL17 protein levels assessed by ELISA in the colon of *Ikka*<sup>ΔIE</sup> and *RANK*<sup>ΔIE</sup> mice that were treated with 2% DSS for 6-days. n=4-7 mice/group. **i** qPCR analysis for *Il17* mRNA in the enteroids treated with 100ng/ml RANKL, 100ng/ml Tweak, 10ng/ml LTα/β for 72-hours. Experiment was done in triplicate. **j** *Il17a* mRNA levels in the flow sorted-immune cells from the peyers patches of 10 wild type mice. Results are expressed as mean ± SEM. Significance was determined using *t* test or one-way ANOVA. \*P < 0.05; \*\*P < 0.01; \*\*\*P < 0.001; \*\*\*\*P < 0.0001.

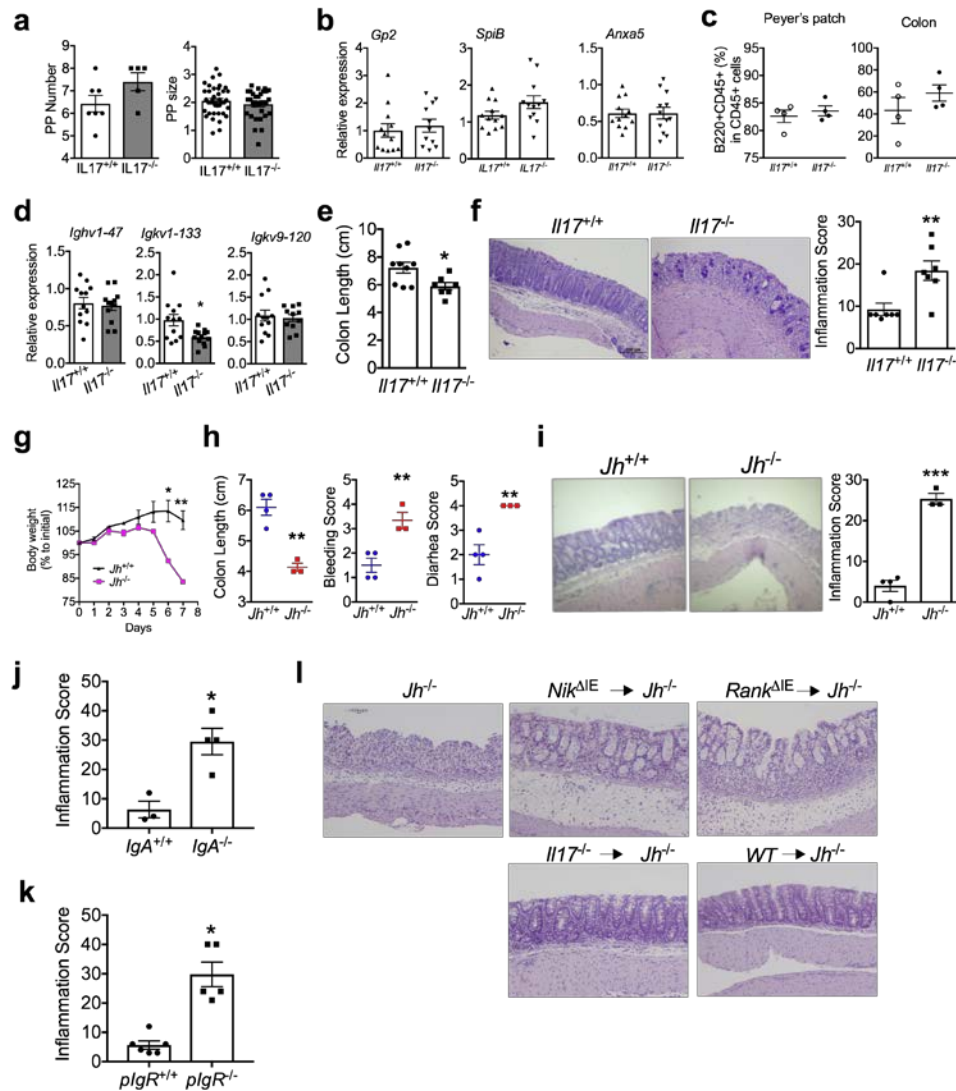

### Supplementary Fig. 5

IL17-mediated IgA production is associated with protection against colitis. **a** Peyer's patch number and size assessed in *IL17<sup>-/-</sup>* mice. n=5-7 mice/group. **b** qPCR analysis for M-cell markers in the PP of *c* mice. **c** Flow analysis for B cells in the Peyer's patch and colon of *IL17<sup>-/-</sup>* mice. **d** qPCR analysis in the Peyer's patch of *IL17<sup>+/+</sup>* and *IL17<sup>-/-</sup>* mice. n=6 mice/group. **e**, **f** Colon length (**e**) and H&E analysis (**f**) in 8-week old *IL17<sup>-/-</sup>* mice treated with DSS for 7-days. Images were taken at 10X magnification. **g-i** Body weight (**g**), colon length, bleeding score and diarrhea score (**h**) and H&E analysis (**i**) of colon in 7-week old *Jh<sup>-/-</sup>* mice that were treated with 2% DSS for 7-days. Images were taken at 10X magnification. **j**, **k** Inflammation score in 6-week old *IgA<sup>+/+</sup>* and *IgA<sup>-/-</sup>* (**j**) and *pIgR<sup>+/+</sup>* and *pIgR<sup>-/-</sup>* mice (**k**) that were treated with 2% DSS for 7-days. **l** H&E analysis in 8-week old *Jh<sup>-/-</sup>* chimeras that were treated with DSS for 7-days. Images were taken at 10X magnification. Results are expressed as mean ± SEM. Significance was determined using *t* test. \**P* < 0.05; \*\**P* < 0.01; \*\*\**P* < 0.001.

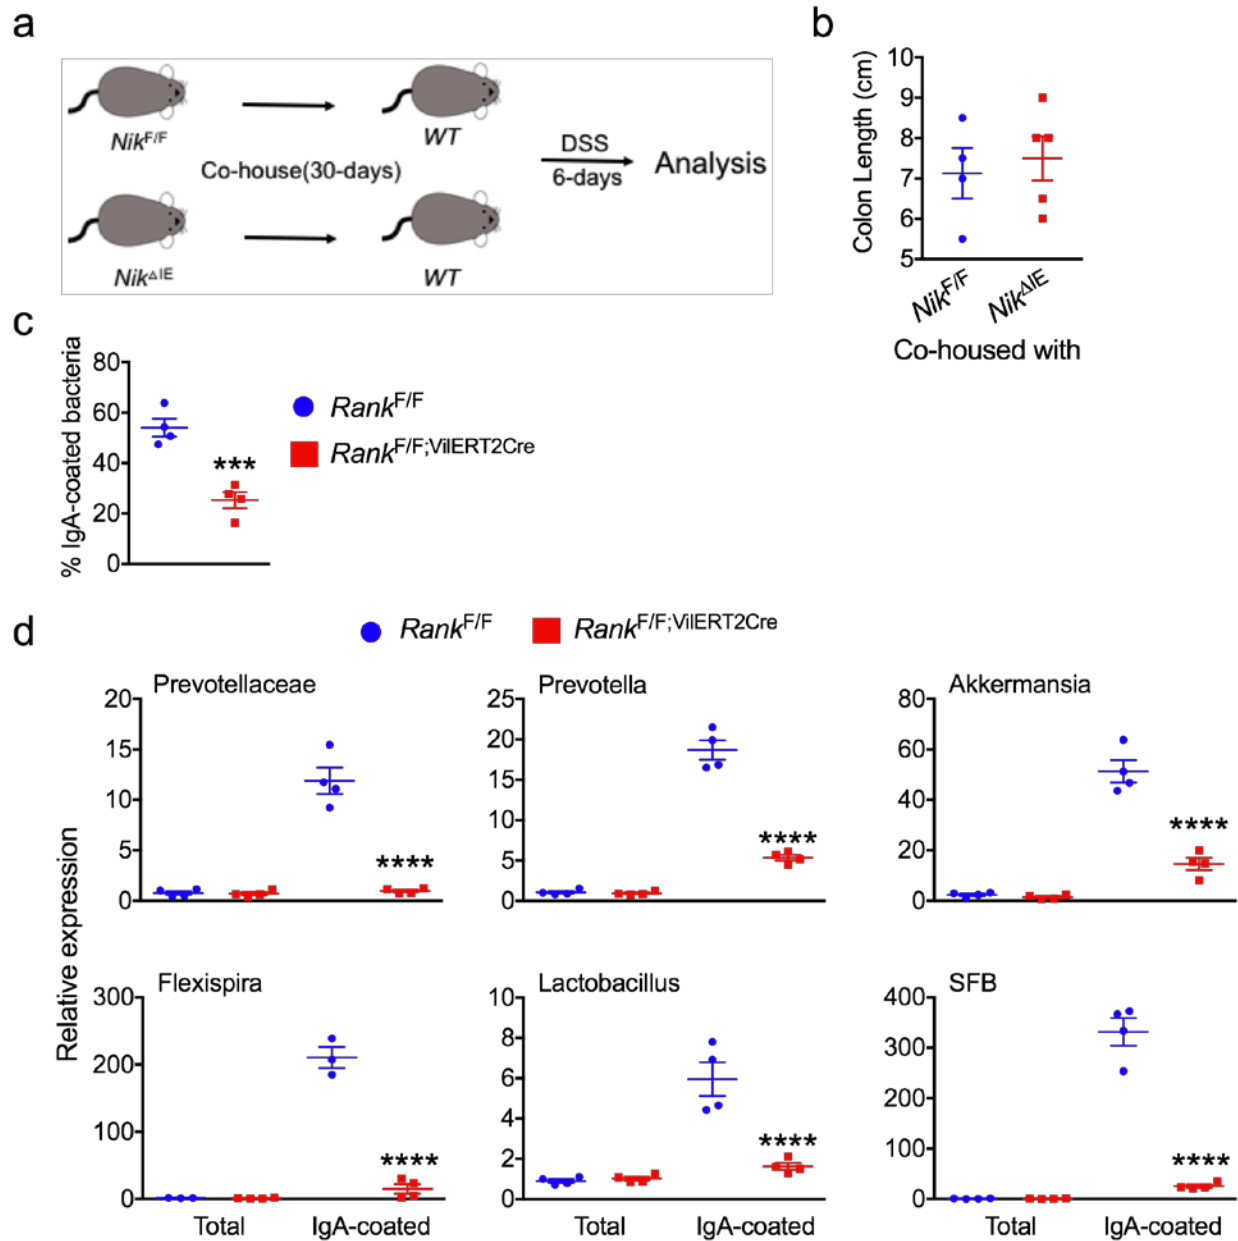

### Supplementary Fig. 6

Epithelial RANK-NIK signaling is essential for IgA coating of colitogenic bacteria. **a** Schematic representation of co-housing of WT mice with *Nik<sup>F/F</sup>* or *Nik<sup>ΔIE</sup>* for 30-days followed by DSS treatment. **b** Colon length of WT mice that were co-housed with either *Nik<sup>F/F</sup>* or *Nik<sup>ΔIE</sup>* mice. **c** Flow analysis of feces sorted for IgA coated bacteria in *Rank<sup>F/F;VilERT2Cre</sup>* mice at 2-weeks after tamoxifen treatment. **d** qPCR analysis for bacterial DNA assessed in flow sorted IgA-coated bacteria in the feces of *Rank<sup>F/F;VilERT2Cre</sup>* mice. Results are expressed as mean ± SEM. Significance was determined using *t* test. \*\*\**P* < 0.001; \*\*\*\**P* < 0.0001.

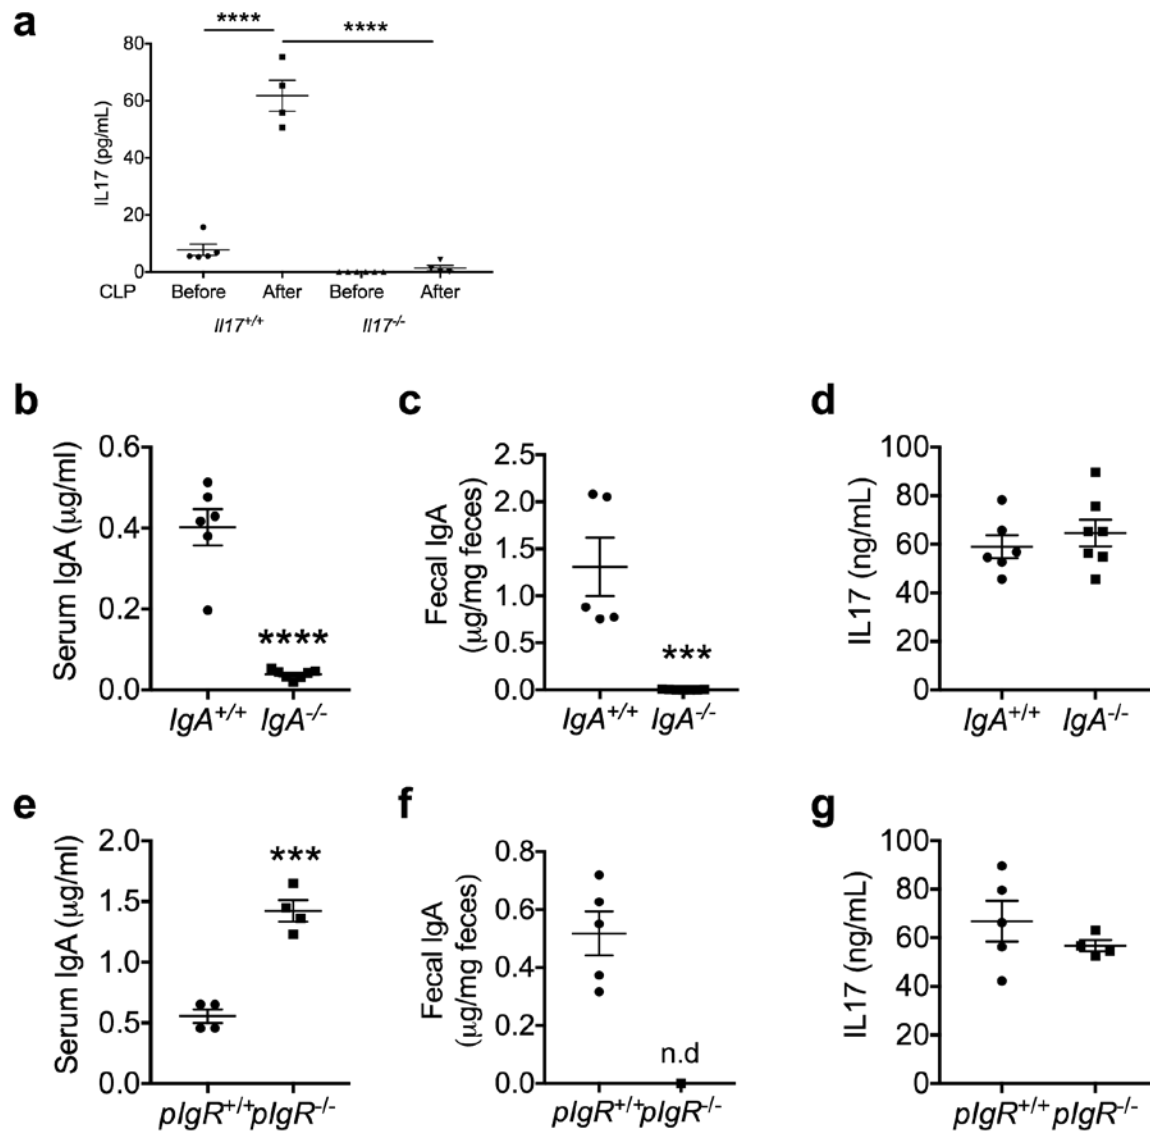

### Supplementary Fig. 7

Serum IgA is protective against polymicrobial sepsis. **a** Serum IL17 at 6-hour post cecal ligation and puncture (CLP) in 6-week old *Il17<sup>-/-</sup>* mice following CLP. **b, c** Serum (**b**) and fecal IgA (**c**) assessed in *IgA<sup>-/-</sup>* mice. **d** Serum IL17 assessed at 6-hours post CLP in *IgA<sup>-/-</sup>* mice. **e, f** Serum (**e**) and fecal IgA (**f**) assessed in *pIgR<sup>-/-</sup>* mice. **g** Serum IL17 assessed in *pIgR<sup>-/-</sup>* mice at 6-hours post CLP. Results are expressed as mean  $\pm$  SEM. Significance determined using *t* test or One-way ANOVA. \*\*\**P* < 0.001; \*\*\*\**P* < 0.0001.



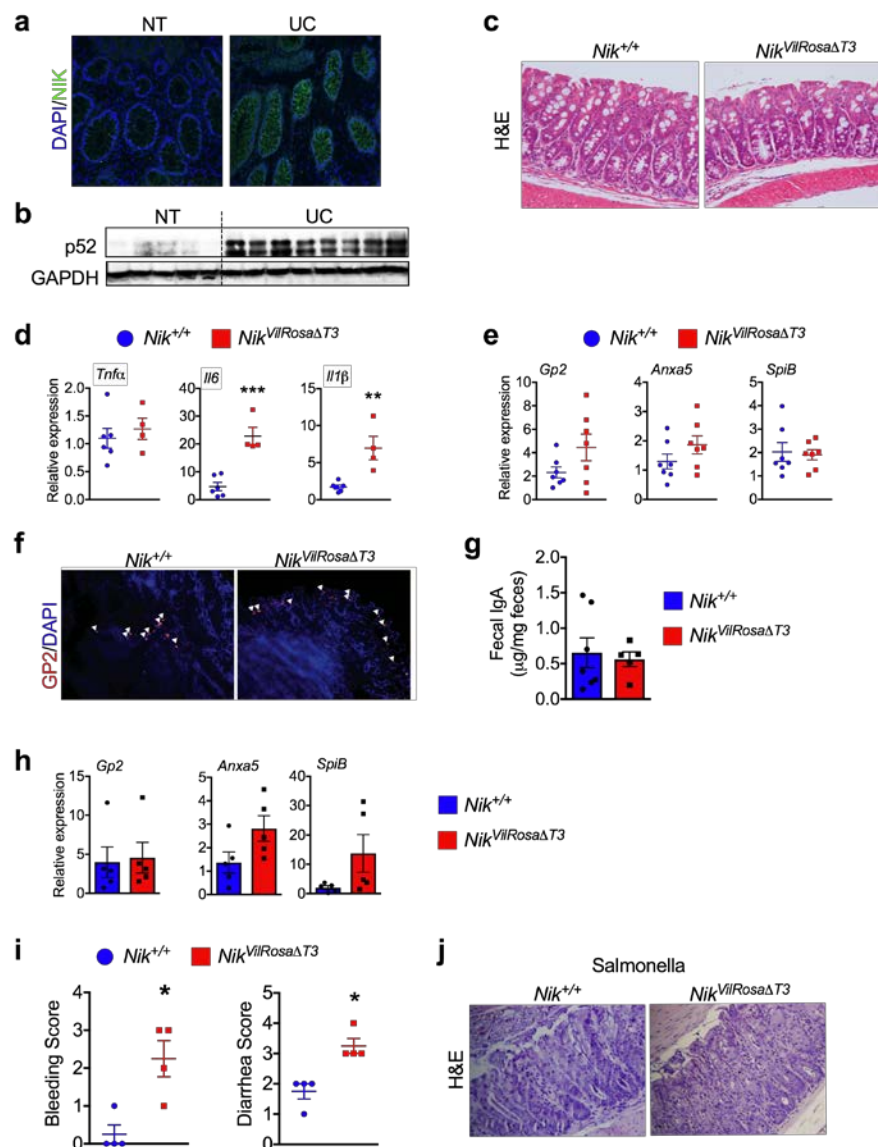

### Supplementary Fig. 8

Constitutive activation of NIK increases proinflammatory response. **a, b** Expression of NIK and p52 assessed by immunostaining (**a**) and Western blot analysis (**b**) in ulcerative colitis (UC) and adjacent normal tissue (NT); n=5-8/group. **c** H&E analysis in untreated colon of *Nik*<sup>+/+</sup> and *Nik*<sup>VilRosaΔT3</sup> mice. Images were taken at 10X magnification. **d** qPCR analysis of inflammatory genes in the colon of *Nik*<sup>+/+</sup> and *Nik*<sup>VilRosaΔT3</sup> mice treated with 2% DSS. **e, f** qPCR analysis for M-cell markers in individual PP (**e**) or small intestine (**f**) from 6-week old *Nik*<sup>+/+</sup> and *Nik*<sup>VilRosaΔT3</sup> mice. Images were taken at 20X magnification. **g** GP2 staining in the colon LF of 6-week old *Nik*<sup>+/+</sup> and *Nik*<sup>VilRosaΔT3</sup> mice. **h** Fecal IgA measured in *Nik*<sup>VilRosaΔT3</sup> mice. **i** Bleeding score and diarrhea score in *Nik*<sup>+/+</sup> and *Nik*<sup>VilRosaΔT3</sup> mice treated with 2% DSS. **j** H&E analysis of colon of *Nik*<sup>+/+</sup> and *Nik*<sup>VilRosaΔT3</sup> mice assessed 6-days after gavage with *Salmonella typhi*. Images were taken at 10X magnification. Results are expressed as mean ± SEM. Significance was determined using *t* test. \*P < 0.05; \*\*P < 0.01; \*\*\*P < 0.001.

**Supplementary Table 1.** List of primers.

| Primer name                      | Primer sequence          |
|----------------------------------|--------------------------|
| <i>Nik</i> F                     | TCCACAGAATGAAGGACAAGCA   |
| <i>Nik</i> R                     | CACCTCGAGTCGTACCTTTTTGA  |
| <i>Tnf-<math>\alpha</math></i> F | AGGGTCTGGGCCATAGAACT     |
| <i>Tnf-<math>\alpha</math></i> R | CCACCACGCTCTTCTGTCTAC    |
| <i>Il-6</i> F                    | ACCAGAGGAAATTTCAATAGGC   |
| <i>Tgf<math>\beta</math></i> F   | CAACCCAGGTCCTTCCTAAA     |
| <i>Tgf<math>\beta</math></i> R   | GGAGAGCCCTGGATACCAAC     |
| <i>Il-6</i> R                    | TGATGCACTTGCAGAAAACA     |
| <i>Il-1<math>\beta</math></i> F  | AAGAGCTTCAGGCAGGCAGTATCA |
| <i>Il-1<math>\beta</math></i> R  | TGCAGCTGTCTAGGAACGTCA    |
| <i>Ikk<math>\alpha</math></i> F  | GGGTTATGCCAAAGATGTTGAT   |
| <i>Ikk<math>\alpha</math></i> R  | ACAGTGGCTGTGTACGG        |
| <i>Igkv9-120</i> F               | CATGAGGGCTCCTGCACAGA     |
| <i>Igkv9-120</i> R               | CAATGTCCTGACTTGCCCGA     |
| <i>Igkv1-133</i> F               | TGATGAGTCCTGCCCAGTTCC    |
| <i>Igkv1-133</i> R               | TGGTTGTCCAATGGTAACCGAC   |
| <i>Ighv1-47</i> F                | GTCCTGCAAGGCTTCTGGCT     |
| <i>Ighv1-47</i> R                | AATGTGGCCTTGCCCTTGAA     |
| <i>Gp2</i> F                     | GCTCAGTTGGCCTCTCAGAA     |
| <i>Gp2</i> R                     | CTGCTACCTCGAAGGGGACT     |
| <i>SpiB</i> F                    | CAGCTGTCCAGGTCGTAGAAG    |
| <i>SpiB</i> R                    | AACCACCATGCTTGCTCTG      |
| <i>Anxa5</i> F                   | CCGAAGGACTTCTGCATCA      |
| <i>Anxa5</i> R                   | GCTCTACTGCCTGCTCCAGT     |
| <i>Muc2</i> F                    | CCTGAAGACTGTGCTGCTGT     |
| <i>Muc2</i> R                    | GGGTAGGGTCACCTCCATCT     |
| <i>Alk Phos</i> F                | GTGCCAGAGAAAGAGAGAGA     |
| <i>Alk Phos</i> R                | TTTCAGGGCATTTCACAGGT     |
| <i>Chga</i> F                    | GTCTCCAGACACTCAGGGCT     |
| <i>Chga</i> R                    | ATGACAAAAGGGGACACCAA     |
| <i>Tff3</i> F                    | GCACCATAACATTGGCTTGG     |
| <i>Tff3</i> R                    | AGAGCCCTCTGGCTAATGCT     |
| <i>Cdh1</i> F                    | AAAAGAAGGCTGTCCCTTGGCC   |
| <i>Cdh1</i> R                    | GAGGTCTACACCTTCCCGGT     |
| <i>Ki67</i> F                    | AGCACAAAGAGACGGTCTAAGA   |
| <i>Ki67</i> R                    | CTCTGCCTCGTGAAGTGTGTT    |
| <i>Tnfrsf11a(RANK)</i> F         | CCGCTAGAGATGAACGTGGA     |
| <i>Tnfrsf11a(RANK)</i> R         | CTGATGAGAAGGGAGCCTCA     |
| <i>Foxp3</i> F                   | CTCGTCTGAAGGCAGAGTCA     |
| <i>Foxp3</i> R                   | TGGCAGAGAGGTATTGAGGG     |

|                         |                            |
|-------------------------|----------------------------|
| <i>Rorc</i> F           | TCCACTACGGGGTTATCACCT      |
| <i>Rorc</i> R           | AGTAGGCCACATTACACTGCT      |
| <i>Ahr</i> F            | CTCCTTCTTGCAAATCCTGC       |
| <i>Ahr</i> R            | GGCCAAGAGCTTCTTTGATG       |
| <i>Il17a</i> F          | TGAGCTTCCCAGATCACAGA       |
| <i>Il17a</i> R          | TCCAGAAGGCCCTCAGACTA       |
| <i>Il22</i> F           | TCGCCTTGATCTCTCCACTC       |
| <i>Il22</i> R           | GCTCAGCTCCTGTCACATCA       |
| <i>Il10</i> F           | CTTACTGACTGGCATGAGGATCA    |
| <i>Il10</i> R           | GCAGCTCTAGGAGCATGTGG       |
| <i>Prevotellaceae</i> F | ATTGGAGGGCAAGTCTGGTG       |
| <i>Prevotellaceae</i> R | CCGATCCCTAGTCGGCATAG       |
| <i>Prevotella</i> F     | CACGGTAAACGATGGATGCC       |
| <i>Prevotella</i> R     | GGTCGGGTTGCAGACC           |
| <i>Akkermansia</i> F    | CAGCACGTGAAGGTGGGGAC       |
| <i>Akkermansia</i> R    | CCTTGCGGTTGGCTTCAGAT       |
| <i>Flexispira</i> F     | AATACATGCAAGTCGAACGATGA    |
| <i>Flexispira</i> R     | AATCACCGTTTCCAGTGGCT       |
| <i>Lactobacillus</i> F  | TGGATGCCTTGGCACTAGGA       |
| <i>Lactobacillus</i> R  | AAATCTCCGGATCAAAGCTTACTTAT |
| <i>SFB</i> F            | GACGCTGAGGCATGAGAGCA       |
| <i>SFB</i> R            | GACGGCACGGATTGTTATTC       |
