# Supplementary material for: Intestinal non-canonical NFκB signaling shapes the local and systemic immune response
Source: PubMed Central journal article supplement (PMC6368617; doi:10.1038/s41467-019-08581-8), 2019-02-08
Supplement: 41467_2019_8581_MOESM3_ESM.pdf [file 41467_2019_8581_MOESM3_ESM.pdf]

## Description of Additional Supplementary Files

File Name: Supplementary Data 1

Description: RNA-SEQ data in the Peyer's Patch from *Nik*<sup>F/F;VilERT2Cre</sup> mice at 2-weeks after tamoxifen treatment.

File Name: Supplementary Data 2

Description: RNA-SEQ data in the Peyer's Patch from *Rank*<sup>F/F;VilERT2Cre</sup> mice at 2-weeks after tamoxifen treatment.

File Name: Supplementary Data 3

Description: List of common genes decreased (from RNA-SEQ) in the Peyer's Patch from *Nik*<sup>F/F;VilERT2Cre</sup> and *Rank*<sup>F/F;VilERT2Cre</sup> mice.

File Name: Supplementary Data 4

Description: List of common genes increased (from RNA-SEQ) in the Peyer's Patch from *Nik*<sup>F/F;VilERT2Cre</sup> and *Rank*<sup>F/F;VilERT2Cre</sup> mice.
